# Supplementary material
Source: MDPI journal article supplement (https://www.mdpi.com/2073-4344/9/1/76)
Supplement: s1 [file s1]

# Benzothiazole Nickelation: an Obstacle to the Catalytic Arylation of Azoles by Cyclopentadienyl Nickel N-Heterocyclic Carbene Complexes

Saurabh Shahane <sup>1</sup>, Bernardo de P. Cardoso <sup>1</sup>, Michael J. Chetcuti <sup>1,\*</sup>, Vincent Ritleng <sup>1,2,\*</sup>

<sup>1</sup> Université de Strasbourg, Ecole européenne de Chimie, Polymères et Matériaux, CNRS, LIMA, UMR 7042, 67000 Strasbourg, France

<sup>2</sup> Institut Universitaire de France, 75000 Paris, France

\* Correspondence: vritleng@unistra.fr; Tel.: +33-(0)3-6885-2797

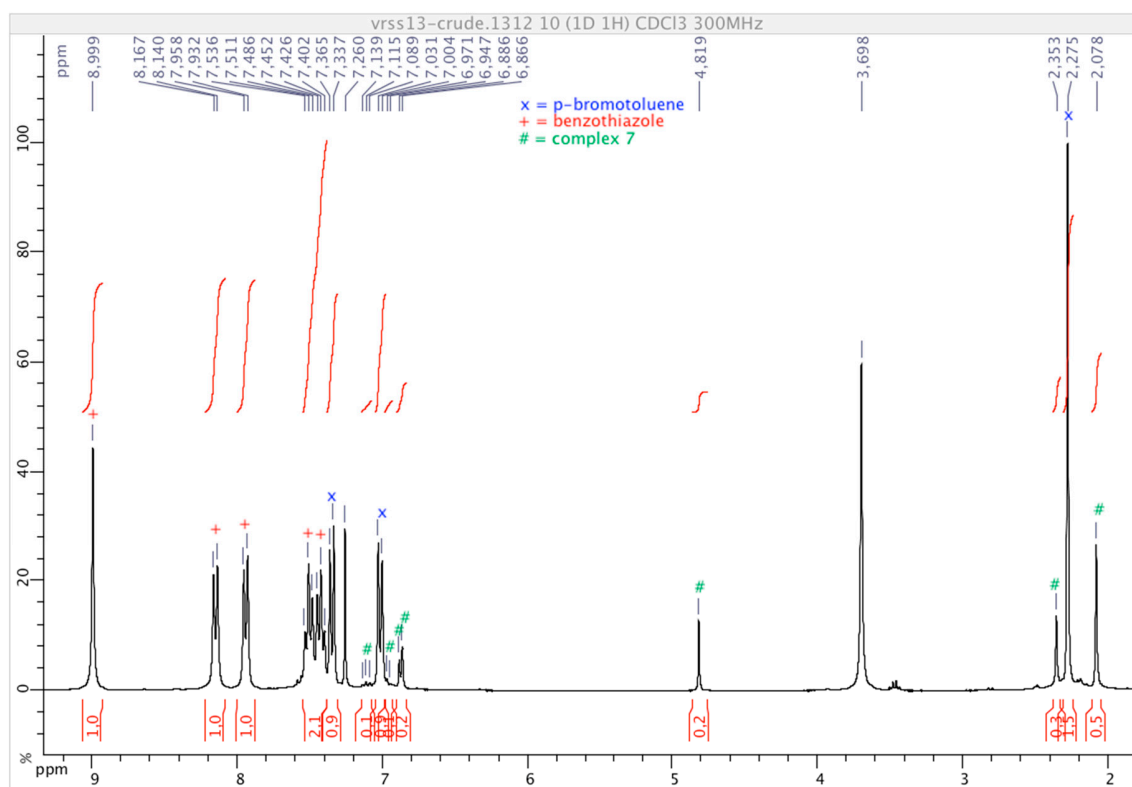

**Figure S1.** <sup>1</sup>H NMR spectrum of a “catalytic” reaction medium after 16 h reaction at 120 °C in 1,4-dioxane between benzothiazole and 4-bromotoluene in the presence of **3** and LiOtBu.

Note: The ‘benzothiazole : haloarene : complex **7**’ ratio slightly varied from one “catalytic” reaction to another, most probably depending on the evaporation, extraction and filtration steps (see experimental section) but the latter were always the only three compounds observed (see also Fig. S2 and S3).

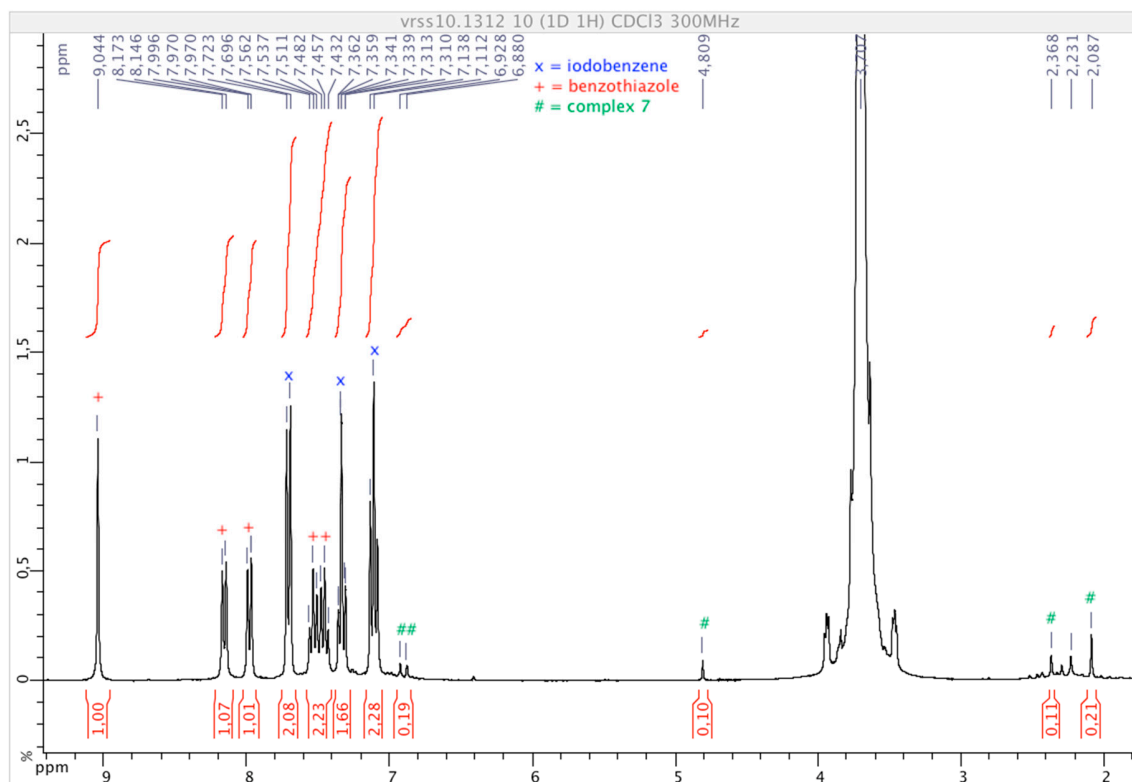

**Figure S2.**  $^1\text{H}$  NMR spectrum of a “catalytic” reaction medium after 16 h reaction at 120 °C in 1,4-dioxane between benzothiazole and iodobenzene in the presence of **3** and KO $t$ Bu.

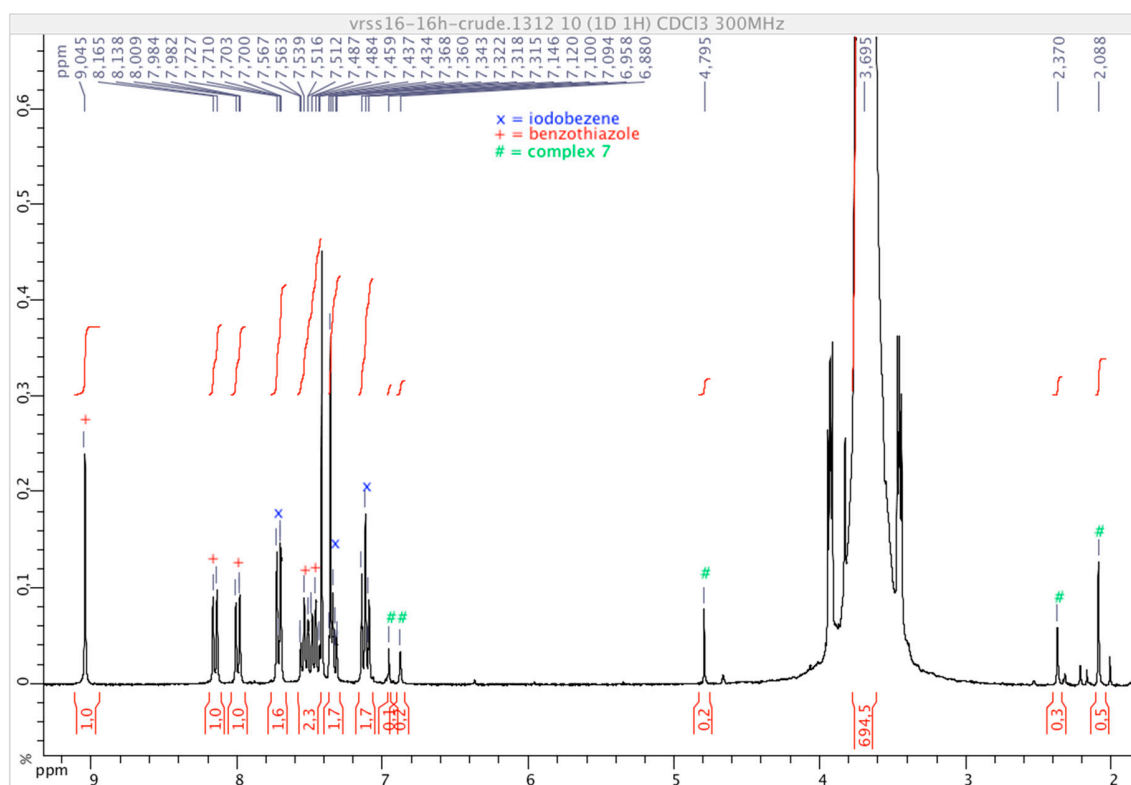

**Figure S3.**  $^1\text{H}$  NMR spectrum of a “catalytic” reaction medium after 16 h reaction at 120 °C in 1,4-dioxane between benzothiazole and iodobenzene in the presence of **6** and LiOtBu.

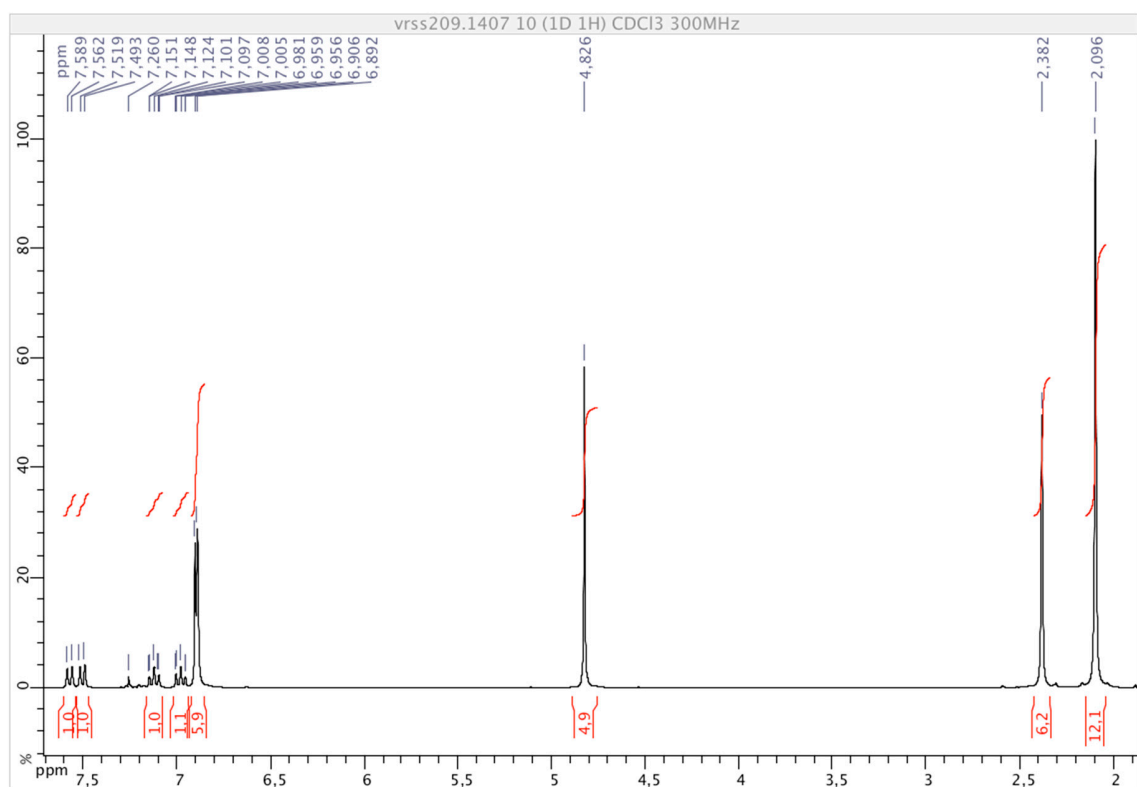

**Figure S4.**  $^1\text{H}$  NMR spectrum of  $[\text{NiCp}(\text{C}_7\text{H}_4\text{NS})(\text{IMes})]$

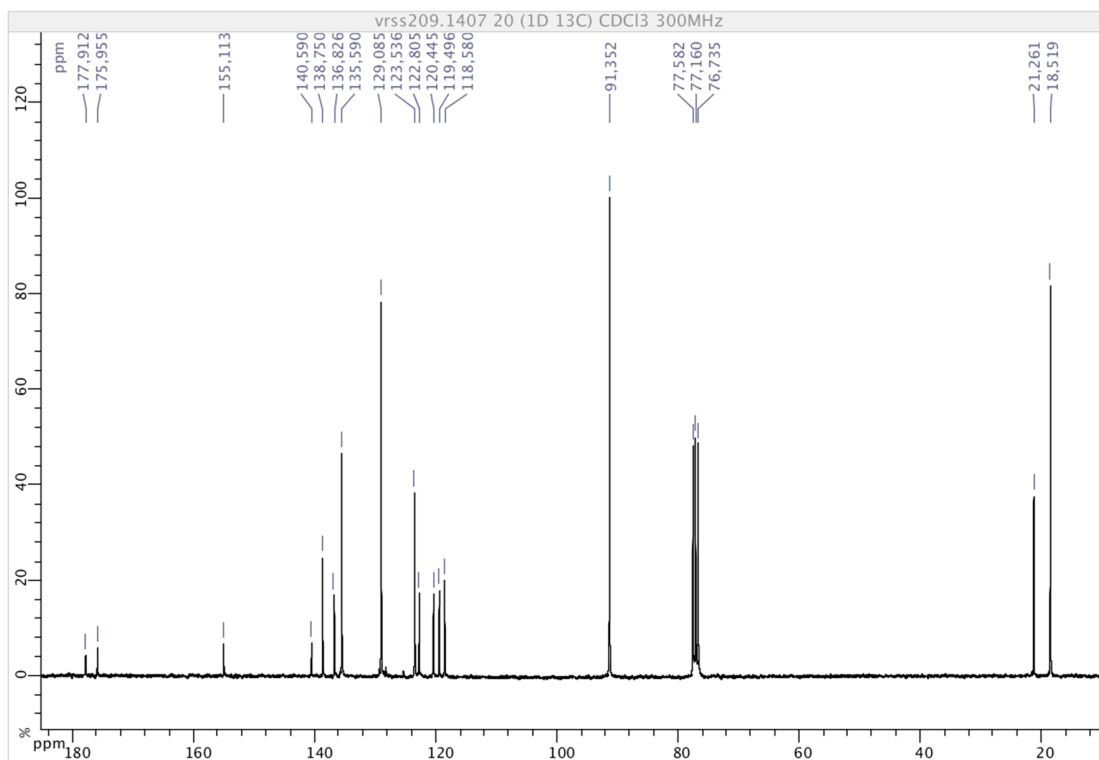

**Figure S5.**  $^{13}\text{C}$   $\{^1\text{H}\}$  NMR spectrum of  $[\text{NiCp}(\text{C}_7\text{H}_4\text{NS})(\text{IMes})]$

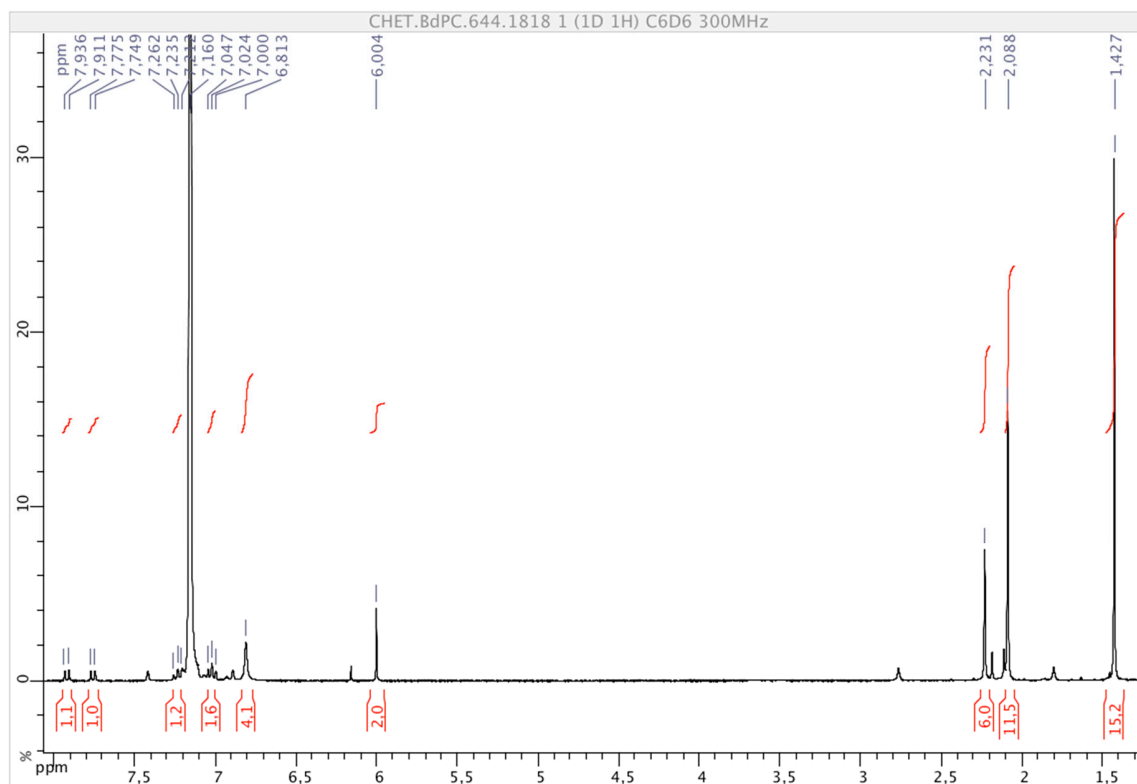

**Figure S6.**  $^1\text{H}$  NMR spectrum of  $[\text{NiCp}^*(\text{C}_7\text{H}_4\text{NS})(\text{IMes})]$

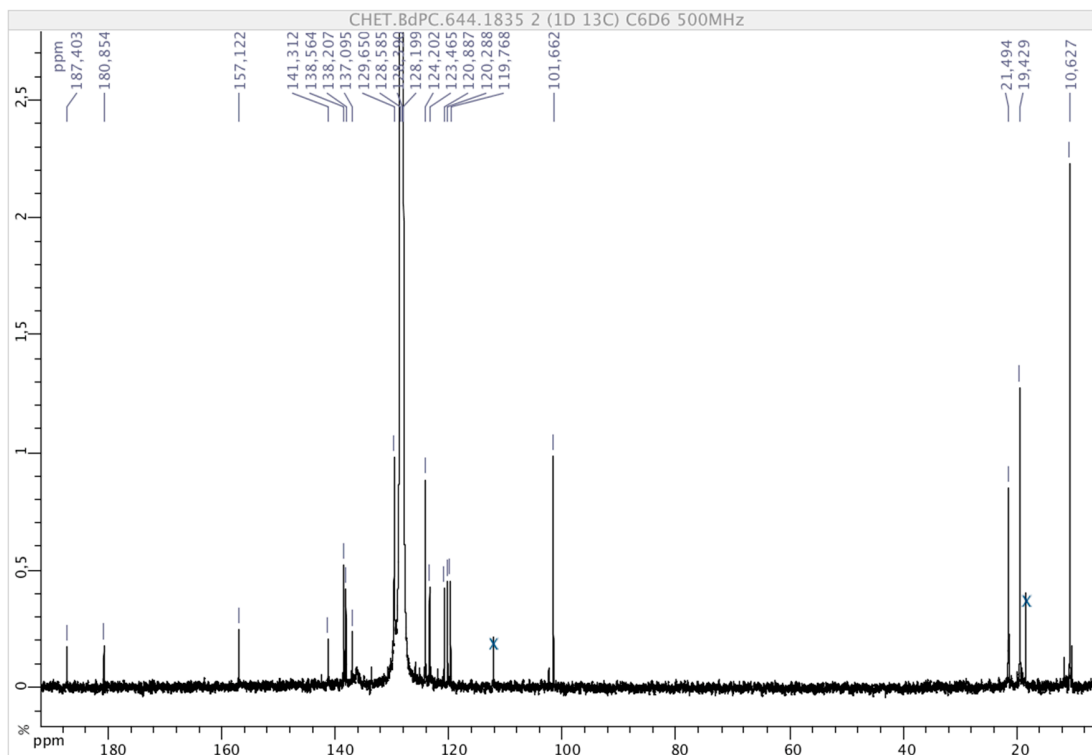

**Figure S7.**  $^{13}\text{C}$   $\{^1\text{H}\}$  NMR spectrum of  $[\text{NiCp}^*(\text{C}_7\text{H}_4\text{NS})(\text{IMes})]$

**Table S1.** Crystal data and refinement details of compound **7**.

|                                                                          |                                                       |
|--------------------------------------------------------------------------|-------------------------------------------------------|
| Compound                                                                 | <b>7</b>                                              |
| Molecular formula                                                        | C <sub>33</sub> H <sub>33</sub> N <sub>3</sub> NiS    |
| Formula weight                                                           | 562.39                                                |
| Crystal system                                                           | Orthorhombic                                          |
| Data collection temperature (K)                                          | 173(2)                                                |
| Crystal size (mm)                                                        | 0.40 × 0.16 × 0.06                                    |
| Crystal form, colour                                                     | Prism, brown                                          |
| Space group                                                              | <i>P</i> 2 <sub>1</sub> 2 <sub>1</sub> 2 <sub>1</sub> |
| <i>a</i> (Å)                                                             | 7.6555(4)                                             |
| <i>b</i> (Å)                                                             | 9.7436 (5)                                            |
| <i>c</i> (Å)                                                             | 37.6422(19)                                           |
| <i>V</i> (Å <sup>3</sup> )                                               | 2807.8(2)                                             |
| <i>Z</i>                                                                 | 4                                                     |
| <i>D</i> <sub>calcd</sub> (g.cm <sup>-3</sup> )                          | 1.330                                                 |
| Absorption coefficient $\mu$ (mm <sup>-1</sup> )                         | 0.792                                                 |
| <i>h</i> , <i>k</i> , <i>l</i> <sub>max</sub>                            | 4, 12, 49                                             |
| Measured reflections                                                     | 11624                                                 |
| Independent reflections, <i>R</i> <sub>int</sub>                         | 5624, 0.0204                                          |
| Reflections with <i>I</i> > 2 $\sigma$ ( <i>I</i> )                      | 5008                                                  |
| <i>R</i> [ <i>F</i> <sup>2</sup> > 2 $\sigma$ ( <i>F</i> <sup>2</sup> )] | 0.0350                                                |
| <i>wR</i> ( <i>F</i> <sup>2</sup> )                                      | 0.0685                                                |
| Goodness-of-fit (GOF) on <i>F</i> <sup>2</sup>                           | 1.047                                                 |
